# Supplementary material
Source: Springer Nature journal article supplement (https://www.springermedizin.de/resource/supplementary/12891_2013_2419_MOESM16_ESM.pdf/9510206)

# Treatment difference from placebo

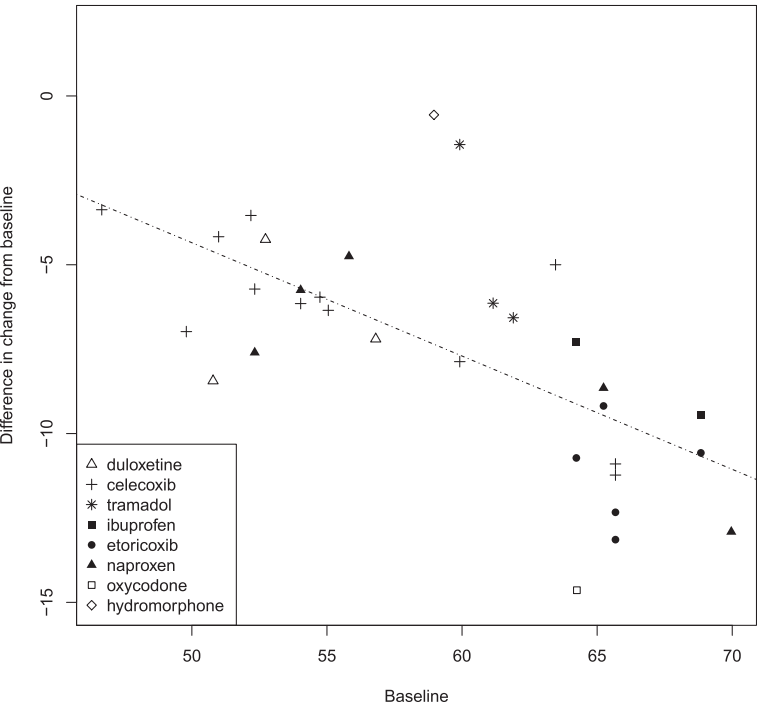

Supplement: MOESM16 [file 9510206]
